# Supplementary material for: Novel coronavirus infection in newborn babies aged <28 days in China
Source: PubMed Central journal article supplement — Eur Respir J. 2020 Jun 18;55(6):2000697. doi: 10.1183/13993003.00697-2020 (PMC7144267; doi:10.1183/13993003.00697-2020), 2020-06-18
Supplement: ERJ-00697-2020.Shareable.pdf [file ERJ-00697-2020.Shareable.pdf]

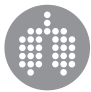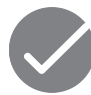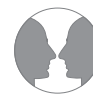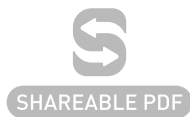

# Novel coronavirus infection in newborn babies aged <28 days in China

Zhi-Jiang Zhang<sup>1,5</sup>, Xue-Jie Yu<sup>1,5</sup>, Tao Fu <sup>2,5</sup>, Yu Liu<sup>3</sup>, Yan Jiang<sup>2</sup>, Bing Xiang Yang <sup>4</sup> and Yongyi Bi<sup>1</sup>

**Affiliations:** <sup>1</sup>Dept of Preventive Medicine, School of Health Sciences, Wuhan University, Wuhan, China. <sup>2</sup>Renmin Hospital of Wuhan University, Wuhan, China. <sup>3</sup>Dept of Statistics, School of Management, Wuhan Institute of Technology, Wuhan, China. <sup>4</sup>Dept of Nursing, School of Health Sciences, Wuhan University, Wuhan, China. <sup>5</sup>Contributed equally.

**Correspondence:** Zhi-Jiang Zhang, Dept of Preventive Medicine, School of Health Sciences, Wuhan University, No. 185 Donghu Road, Wuhan 430071, China. E-mail: zhang22968@163.com

 @ERSpublications

**Neonates are susceptible to SARS-CoV-2 infection. The symptoms in neonates were milder and outcomes were less severe compared to adults. Intrauterine vertical transmission is not impossible but direct evidence is still lacking.** <https://bit.ly/342jGK9>

**Cite this article as:** Zhang Z-J, Yu X-J, Fu T, *et al.* Novel coronavirus infection in newborn babies aged <28 days in China. *Eur Respir J* 2020; 55: 2000697 [<https://doi.org/10.1183/13993003.00697-2020>].

This single-page version can be shared freely online.

*To the Editor:*

The outbreak of coronavirus disease 2019 (COVID-19) is spreading rapidly [1–8]. On 31 January 2020, the World Health Organization declared COVID-19 a public health emergency of international concern. By 13 March 2020, COVID-19 had been confirmed in 127 countries, with 145 166 cases and 5428 deaths worldwide.
